# Supplementary material for: Epidermal growth factor receptor pathway mutation and expression profiles in cervical squamous cell carcinoma: therapeutic implications
Source: PubMed Central journal article supplement (PMC4513684; doi:10.1186/s12967-015-0611-0), 2015-07-25

**Patient A**

**Patient B**

**Patient C**

**Patient D**

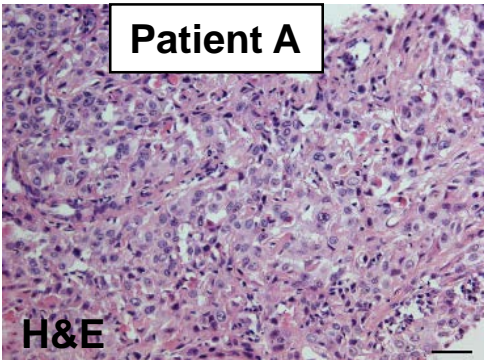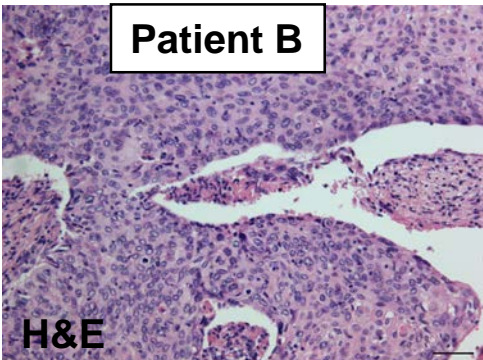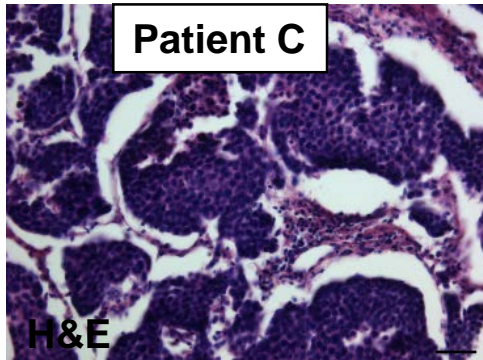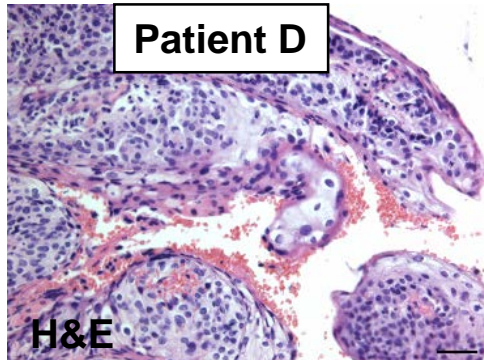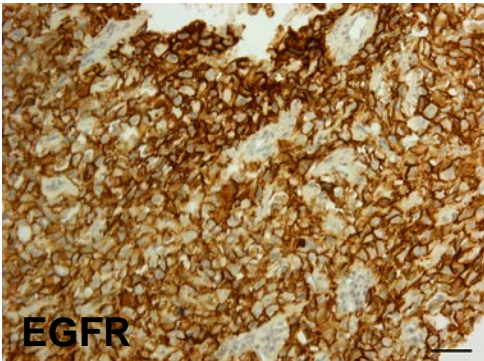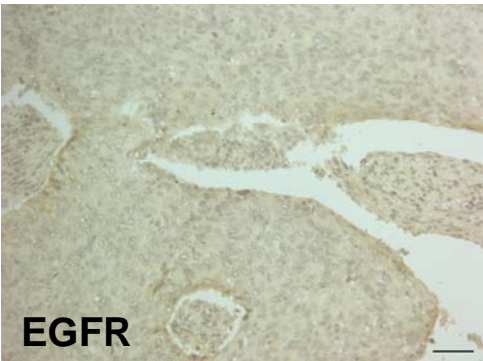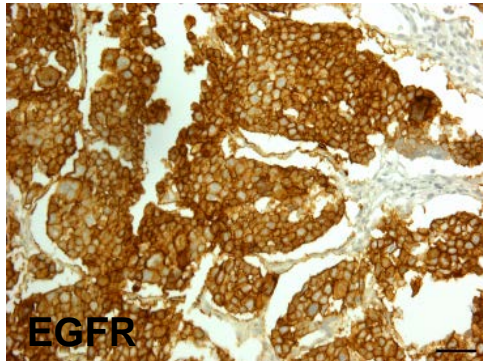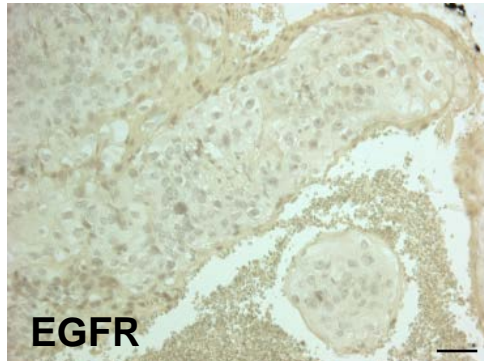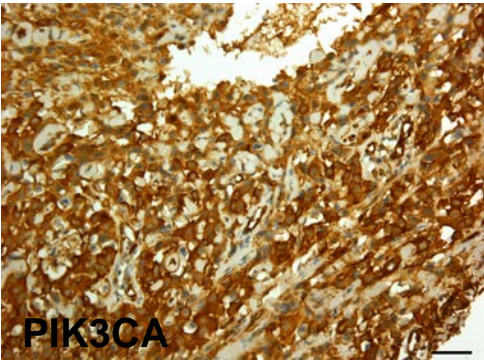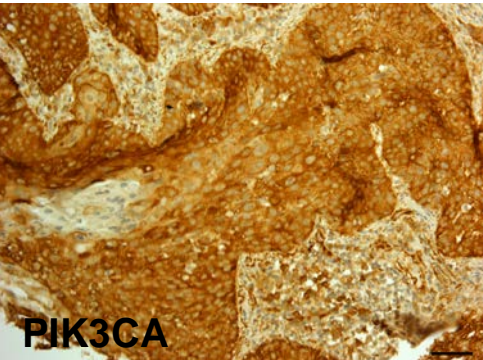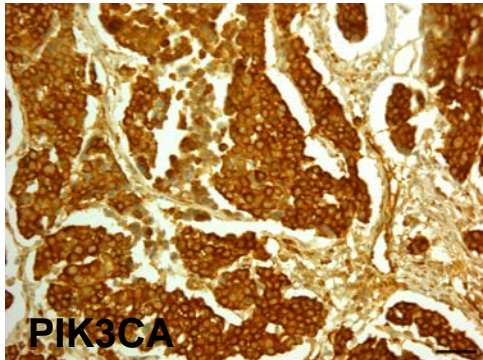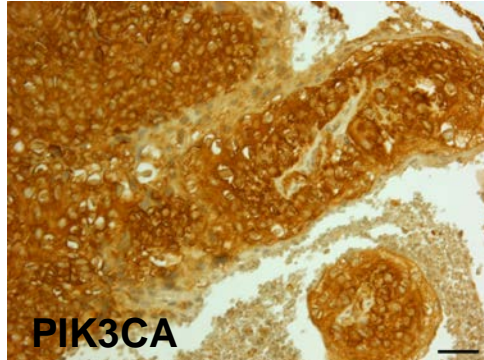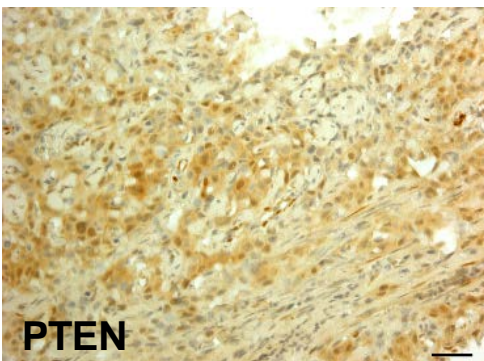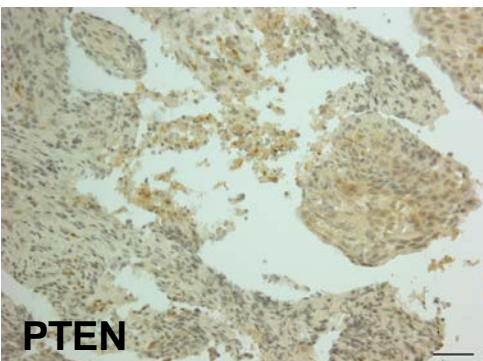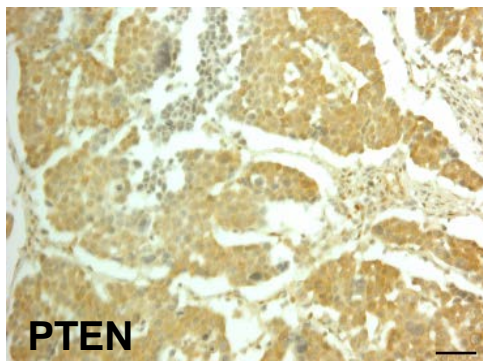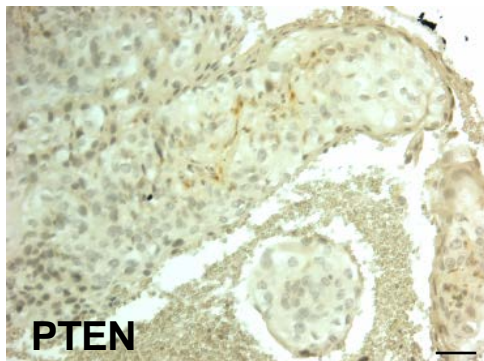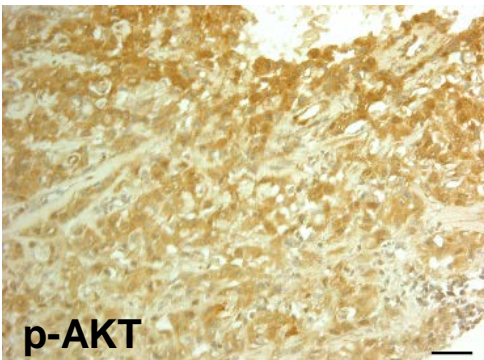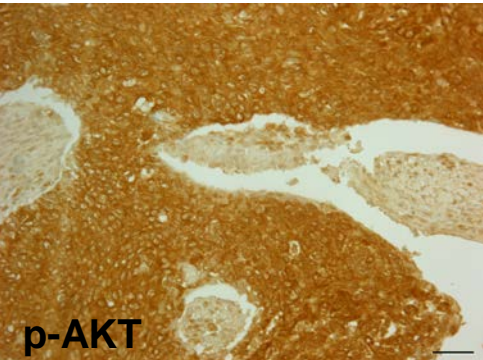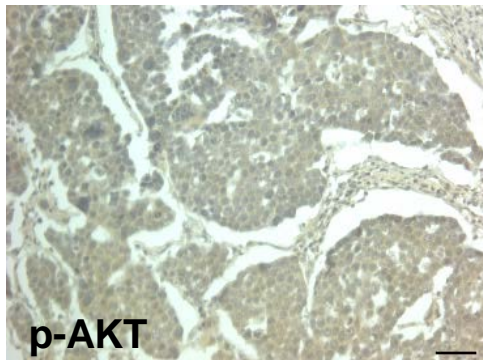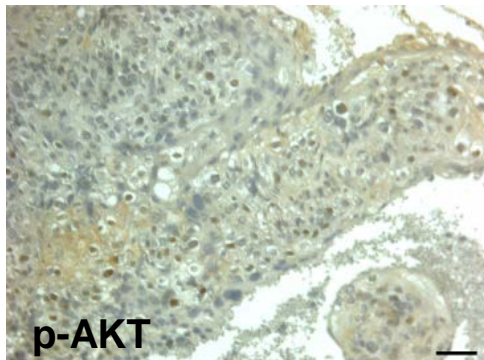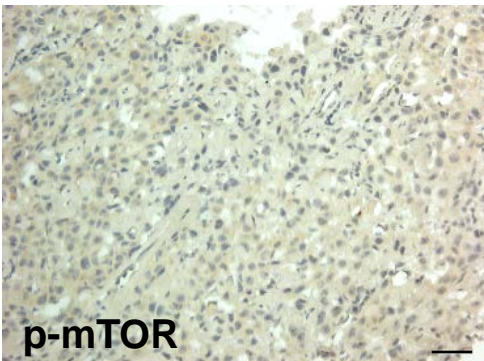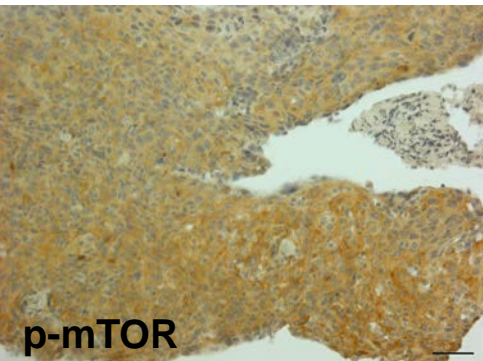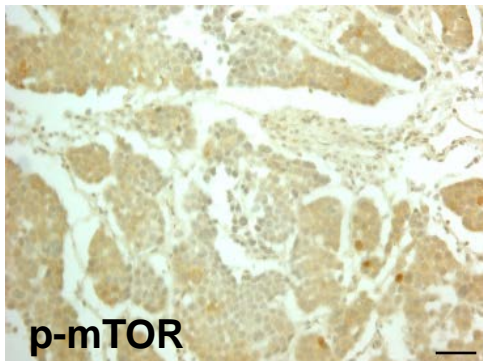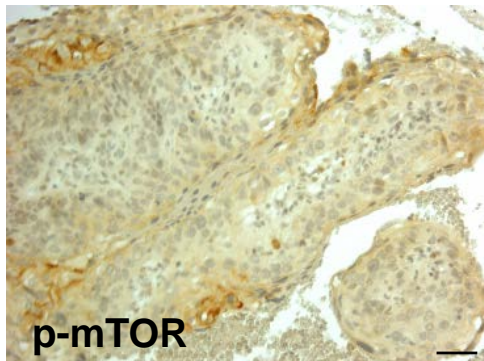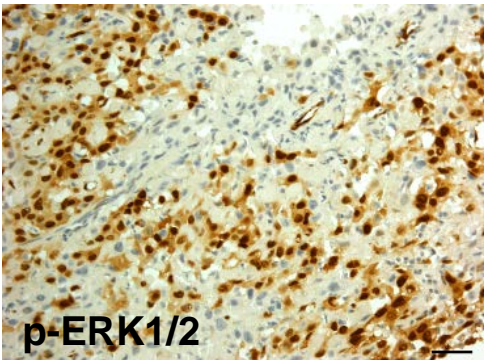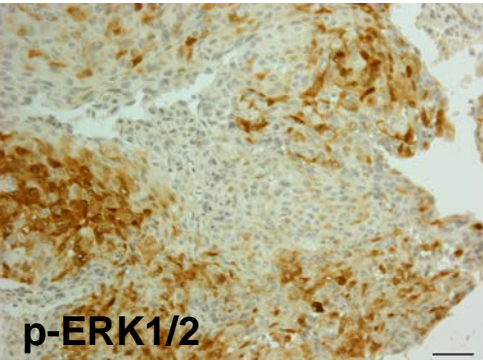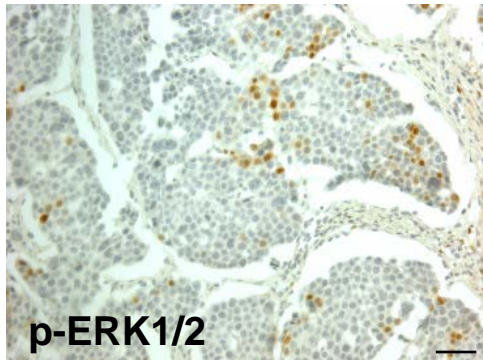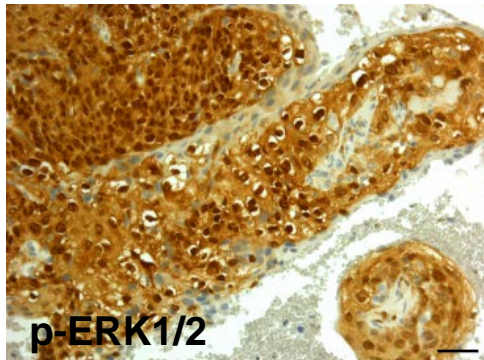

Supplement: 12967_2015_611_MOESM2_ESM.pdf [file 12967_2015_611_MOESM2_ESM.pdf]
